# Supplementary material for: Aggregatibacter actinomycetemcomitans Induces Autophagy in Human Junctional Epithelium Keratinocytes
Source: PubMed Central journal article supplement (PMC7290389; doi:10.3390/cells9051221), 2020-05-14

# Figure S1

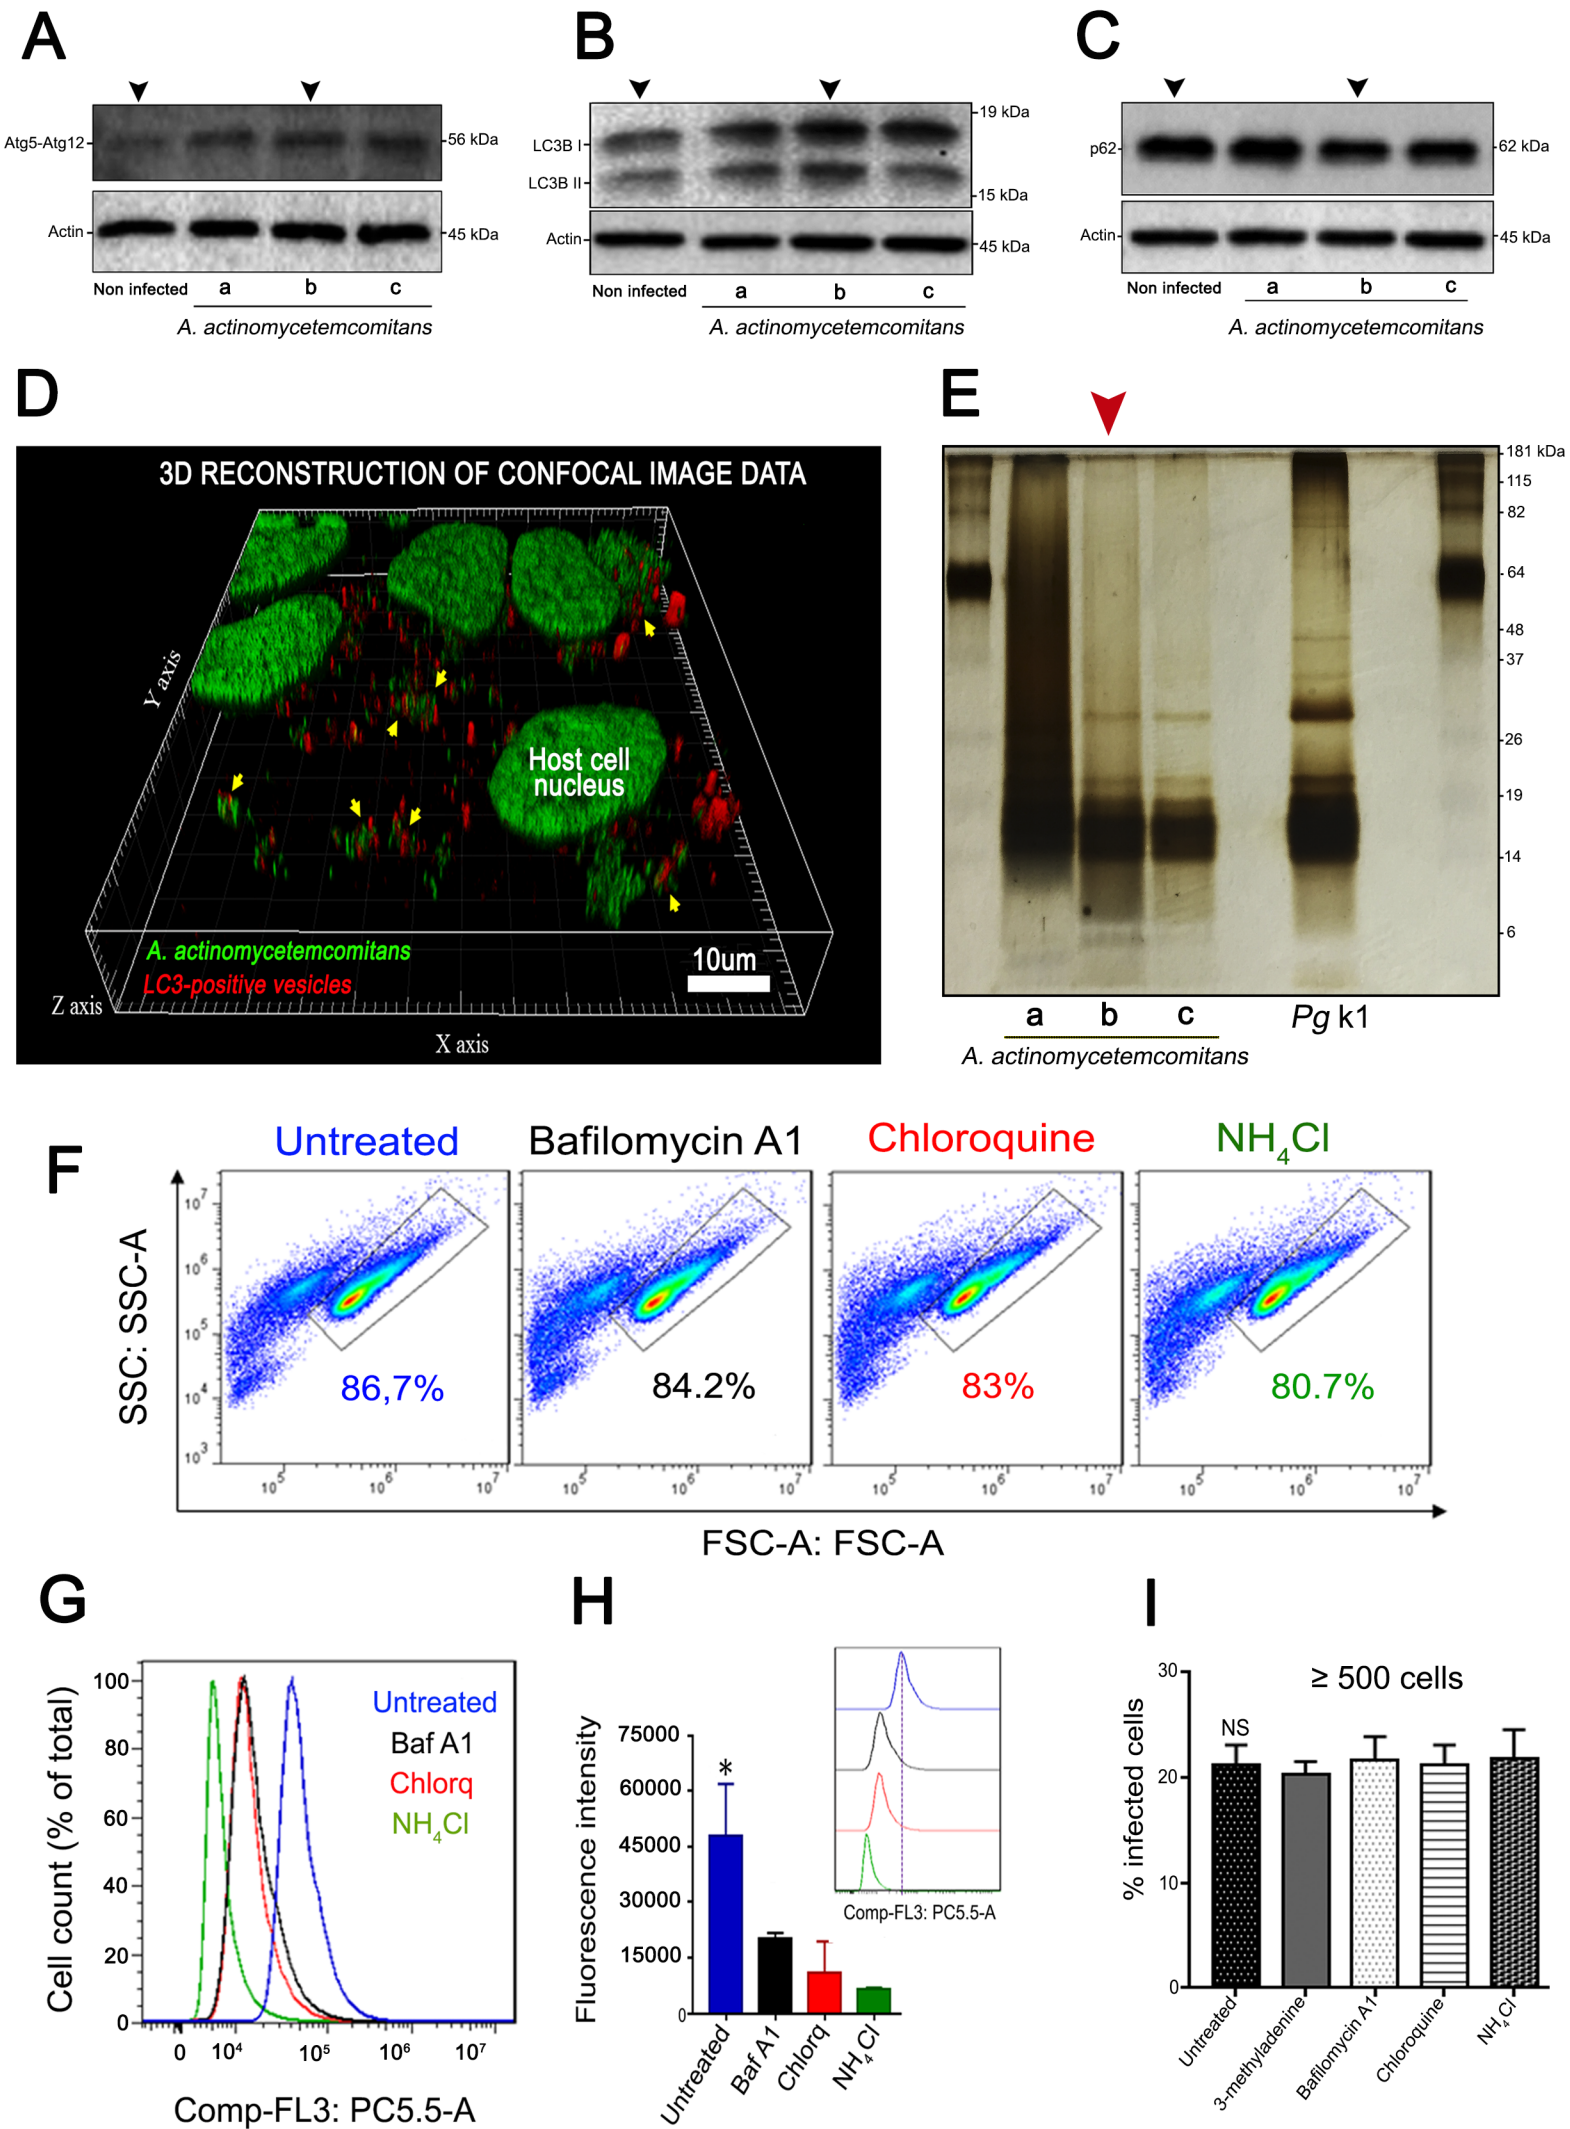

Supplement: cells-09-01221-s001.pdf [file cells-09-01221-s001.pdf]
